# Supplementary material for: Single-inhaler triple therapy in symptomatic COPD patients: FULFIL subgroup analyses
Source: PubMed Central journal article supplement — ERJ Open Res. 2018 May 4;4(2):00119-2017. doi: 10.1183/23120541.00119-2017 (PMC5934530; doi:10.1183/23120541.00119-2017), 2018-05-04
Supplement: 00119-2017_supplementary.pdf [file 00119-2017_supplementary.pdf]

## Supplementary material

### Methods

SUPPLEMENTARY TABLE S1 Patient subgroups included in these subanalyses

---

#### Subgroups

---

##### **COPD medication at screening**

ICS+LABA

BUD+FOR

ICS+LABA+LAMA

LAMA alone

TIO alone

LAMA+LABA

##### **Disease severity at screening**

1. FEV<sub>1</sub> <50%, no moderate/severe exacerbations
2. FEV<sub>1</sub> <50%, ≥1 moderate/severe exacerbation
3. FEV<sub>1</sub> ≥50–<80%, ≥2 moderate/≥1 severe exacerbation

##### **Exacerbation history in previous 12 months**

0/1 exacerbation

≥2 moderate exacerbations (no severe exacerbations)

≥1 severe exacerbation

---

COPD: chronic obstructive pulmonary disease; ICS: inhaled corticosteroid; LABA: long-acting  $\beta_2$  agonist; BUD: budesonide; FOR: formoterol; LAMA: long-acting muscarinic antagonist; TIO, tiotropium; FEV<sub>1</sub>: forced expiratory volume in 1 s.

## Results

SUPPLEMENTARY TABLE S2 Mean change from baseline in trough FEV<sub>1</sub> and SGRQ Total score, in the COPD medication class, disease severity and exacerbation history subgroups at week 52 (EXT population)

| Subgroup                                                          | Mean change from baseline in trough FEV <sub>1</sub> , mL (95% CI) |                  |                               | Mean change from baseline in SGRQ Total score (95% CI) |                    |                               |
|-------------------------------------------------------------------|--------------------------------------------------------------------|------------------|-------------------------------|--------------------------------------------------------|--------------------|-------------------------------|
|                                                                   | FF/UMEC/VI                                                         | BUD/FOR          | Difference, (95% CI), p-value | FF/UMEC/VI                                             | BUD/FOR            | Difference, (95% CI), p-value |
| <b>COPD medication class at screening</b>                         |                                                                    |                  |                               |                                                        |                    |                               |
| ICS+LABA                                                          | 184 (128, 240)                                                     | 5 (-53, 64)      | 178 (97, 260)<br><0.001       | -6.2 (-9.2, -3.2)                                      | -6.9 (-10.1, -3.6) | 0.7 (-3.8, 5.1)<br>0.768      |
| BUD+FOR                                                           | 201 (100, 303)                                                     | -45 (-155, 64)   | 247 (91, 403)<br>0.003        | -5.2 (-10.2, -0.2)                                     | -1.3 (-6.9, 4.3)   | -3.9 (-11.5, 3.7)<br>0.311    |
| ICS+LABA+LAMA                                                     | 52 (-11, 115)                                                      | -110 (-179, -41) | 162 (68, 256)<br><0.001       | -0.5 (-4.5, 3.5)                                       | 4.3 (0.0, 8.7)     | -4.8 (-10.8, 1.1)<br>0.111    |
| LAMA alone                                                        | 229 (101, 358)                                                     | 0 (-127, 126)    | 230 (45, 414)<br>0.016        | -7.1 (-14.7, 0.4)                                      | -0.8 (-8.2, 6.6)   | -6.3 (-17.1, 4.4)<br>0.241    |
| TIO alone                                                         | 290 (139, 440)                                                     | 25 (-118, 168)   | 264 (54, 475)<br>0.016        | -5.8 (-14.5, 2.8)                                      | -6.1 (-14.3, 2.1)  | 0.3 (-12.1, 12.6)<br>0.967    |
| LAMA+LABA                                                         | 114 (18, 209)                                                      | -157 (-273, -41) | 270 (120, 421)<br><0.001      | -4.6 (-10.7, 1.5)                                      | -2.0 (-8.9, 4.8)   | -2.5 (-11.7, 6.7)<br>0.580    |
| <b>Disease severity</b>                                           |                                                                    |                  |                               |                                                        |                    |                               |
| FEV <sub>1</sub> <50% predicted, no moderate/severe exacerbations | 107 (43, 170)                                                      | -118 (-184, -51) | 224 (135, 313)<br><0.001      | -0.5 (-4.2, 3.1)                                       | 1.2 (-2.7, 5.0)    | -1.7 (-7.0, 3.6)<br>0.531     |

|                                                                              |                |               |                           |                    |                   |                           |
|------------------------------------------------------------------------------|----------------|---------------|---------------------------|--------------------|-------------------|---------------------------|
| FEV <sub>1</sub> <50% predicted,<br>≥1 moderate/ severe exacerbations        | 101 (41, 160)  | -39 (-98, 20) | 140 (59, 221)<br><0.001   | -4.4 (-7.9, -0.9)  | -2.3 (-5.7, 1.1)  | -2.1 (-6.9, 2.7)<br>0.398 |
| FEV <sub>1</sub> ≥50–<80% predicted,<br>≥2 moderate/ ≥1 severe exacerbations | 162 (100, 224) | -17 (-78, 45) | 179 (100, 258),<br><0.001 | -7.9 (-11.2, -4.6) | -4.1 (-7.4, -0.7) | -3.8 (-8.5, 0.8)<br>0.106 |

### Exacerbation history

|              |               |                 |                           |                    |                    |                             |
|--------------|---------------|-----------------|---------------------------|--------------------|--------------------|-----------------------------|
| 0/1 moderate | 124 (84, 164) | -46 (-87, -6)   | 170 (113, 227),<br><0.001 | -4.3 (-6.6, -2.0)  | -3.3 (-5.6, -0.9)  | -1.0 (-4.3, 2.3)<br>0.543   |
| ≥2 moderate  | 126 (65, 188) | -73 (-135, -10) | 199 (111, 287)<br><0.001  | -5.2 (-9.0, -1.4)  | 1.0 (-2.9, 4.9)    | -6.2 (-11.6, -0.7)<br>0.026 |
| ≥1 severe    | 166 (99, 234) | 38 (-33, 108)   | 129 (30, 227)<br>0.011    | -9.2 (-12.9, -5.6) | -8.4 (-12.2, -4.6) | -0.8 (-6.1, 4.5)<br>0.758   |

FEV<sub>1</sub>: forced expiratory volume in 1 s; SGRQ: St George's Respiratory Questionnaire; COPD: chronic obstructive pulmonary disease; EXT: extension; CI: confidence interval; FF/UMEC/VI: fluticasone furoate/umeclidinium/vilanterol; BUD/FOR: budesonide/formoterol; ICS: inhaled corticosteroid; LABA: long-acting β<sub>2</sub> agonists; LAMA: long-acting muscarinic antagonists; TIO, tiotropium.

SUPPLEMENTARY TABLE S3 LS mean change from baseline in trough FEV<sub>1</sub> and SGRQ Total score, in the additional prior medication and disease severity subgroups at week 24 (ITT population)

| Subgroup                                                   | Mean change from baseline in trough FEV <sub>1</sub> , mL (95% CI) |                 |                              | Mean change from baseline in SGRQ Total score (95% CI) |                   |                              |
|------------------------------------------------------------|--------------------------------------------------------------------|-----------------|------------------------------|--------------------------------------------------------|-------------------|------------------------------|
|                                                            | FF/UMEC/VI                                                         | BUD/FOR         | Difference, (95% CI) p-value | FF/UMEC/VI                                             | BUD/FOR           | Difference, (95% CI) p-value |
| Prior medication                                           |                                                                    |                 |                              |                                                        |                   |                              |
| LABA                                                       | 206 (145, 268)                                                     | -28 (-88, 32)   | 234 (147, 320)<br><0.001     | -6.0 (-9.5, -2.6)                                      | 0.5 (-2.8, 3.8)   | -6.5 (-11.3, -1.7)<br>0.009  |
| Not on ICS+LABA+LAMA                                       | 160 (140, 180)                                                     | -11 (-31, 9)    | 171 (142, 199)<br><0.001     | -7.7 (-8.8, -6.6)                                      | -4.9 (-6.0, -3.8) | -2.8 (-4.3, -1.3)<br><0.001  |
| Disease severity                                           |                                                                    |                 |                              |                                                        |                   |                              |
| FEV <sub>1</sub> <50%, ≥2 moderate/ ≥1 severe exacerbation | 205 (174, 235)                                                     | -12 (-43, 19)   | 216 (177, 256)<br><0.001     | -8.4 (-10.0, -6.9)                                     | -6.2 (-7.8, -4.6) | -2.2 (-4.4, -0.1)<br>0.044   |
| FEV <sub>1</sub> <50%, 1 moderate exacerbation             | 114 (73, 155)                                                      | -22 (-63, 20)   | 136 (77, 195)<br><0.001      | -5.1 (-7.5, -2.8)                                      | -0.7 (-3.2, 1.7)  | -4.4 (-7.8, -1.0)<br>0.011   |
| FEV <sub>1</sub> ≥50%                                      | 210 (180, 241)                                                     | -6 (-37, 25)    | 216 (176, 256)<br><0.001     | -8.5 (-10.1, -7.0)                                     | -6.3 (-7.8, -4.7) | -2.3 (-4.4, -0.1)<br>0.039   |
| FEV <sub>1</sub> ≥30%–<50%                                 | 122 (100, 144)                                                     | -34 (-57, -12)  | 156 (125, 188)<br><0.001     | -6.1 (-7.3, -4.9)                                      | -4.4 (-5.7, -3.2) | -1.7 (-3.4, 0.0)<br>0.054    |
| FEV <sub>1</sub> <30%                                      | 43 (-8, 94)                                                        | -66 (-116, -16) | 109 (42, 175)<br>0.001       | -2.8 (-5.5, -0.2)                                      | 1.1 (-1.5, 3.6)   | -3.9 (-7.5, -0.3)<br>0.035   |

LS: least squares; FEV<sub>1</sub>: forced expiratory volume in 1 s; SGRQ: St George's Respiratory Questionnaire; ITT: intent-to-treat; CI: confidence interval; FF/UMEC/VI: fluticasone furoate/umeclidinium/vilanterol; BUD/FOR: budesonide/formoterol; LABA: long-acting β<sub>2</sub> agonists; ICS: inhaled corticosteroid; LAMA: long-acting muscarinic antagonists.

SUPPLEMENTARY TABLE S4 On-treatment adverse events occurring in  $\geq 2\%$  of patients in either subgroup by exacerbation history in the previous 12 months, up to week 24 (ITT population)

| Adverse events,<br>n (%)    | <2 moderate exacerbations                          |                                            | $\geq 2$ moderate/ $\geq 1$ severe<br>exacerbation |                                            |
|-----------------------------|----------------------------------------------------|--------------------------------------------|----------------------------------------------------|--------------------------------------------|
|                             | FF/UMEC/VI<br>100/62.5/25 $\mu\text{g}$<br>(n=418) | BUD/FOR<br>400/12 $\mu\text{g}$<br>(n=421) | FF/UMEC/VI<br>100/62.5/25 $\mu\text{g}$<br>(n=493) | BUD/FOR<br>400/12 $\mu\text{g}$<br>(n=478) |
| Nasopharyngitis             | 33 (8)                                             | 21 (5)                                     | 31 (6)                                             | 22 (5)                                     |
| Headache                    | 21 (5)                                             | 20 (5)                                     | 23 (5)                                             | 33 (7)                                     |
| Back pain                   | 8 (2)                                              | 12 (3)                                     | 11 (2)                                             | 6 (1)                                      |
| COPD                        | 7 (2)                                              | 12 (3)                                     | 8 (2)                                              | 11 (2)                                     |
| URTI                        | 9 (2)                                              | 7 (2)                                      | 11 (2)                                             | 12 (3)                                     |
| Upper abdominal<br>pain     | 6 (1)                                              | 8 (2)                                      | –                                                  | –                                          |
| Arthralgia                  | 6 (1)                                              | 8 (2)                                      | 11 (2)                                             | 5 (1)                                      |
| Hypertension                | 4 (<1)                                             | 9 (2)                                      | –                                                  | –                                          |
| Rhinitis                    | 5 (1)                                              | 7 (2)                                      | –                                                  | –                                          |
| Pneumonia                   | 8 (2)                                              | 2 (<1)                                     | 11 (2)                                             | 5 (1)                                      |
| Pharyngitis                 | 5 (1)                                              | 3 (<1)                                     | 10 (2)                                             | 6 (1)                                      |
| Oropharyngeal<br>pain       | –                                                  | –                                          | 7 (1)                                              | 8 (2)                                      |
| Rhinorrhoea                 | 1 (<1)                                             | 4 (<1)                                     | 2 (<1)                                             | 8 (2)                                      |
| Blood pressure<br>increased | –                                                  | –                                          | 1 (<1)                                             | 8 (2)                                      |

ITT: intent-to-treat; FF/UMEC/VI: fluticasone furoate/umeclidinium/vilanterol; BUD/FOR: budesonide/formoterol; COPD: chronic obstructive pulmonary disease; URTI: upper respiratory tract infection.
